# Supplementary material
Source: publisher figshare collection journal article supplement (https://acs.figshare.com/ndownloader/files/27512797)
Supplement: Supplementary file 1 [file 27512797]

**Supporting Information**  
**for**  
**Tryptophan probes of TDP-43 C-terminal domain amyloid formation**

Sydney O. Shuster and Jennifer C. Lee\*

Laboratory of Protein Conformation and Dynamics, Biochemistry and Biophysics Center, National Heart,  
Lung, and Blood Institute, National Institutes of Health, Bethesda, Maryland, 20892

\*Corresponding author: Jennifer C. Lee

Email: [leej4@nhlbi.nih.gov](mailto:leej4@nhlbi.nih.gov)

[Phone: 301-827-0723](tel:301-827-0723)

**This SI includes:**

Extended experimental details on TDP-43<sub>CTD</sub> expression, TEV purification, and limited proteolysis.

**Table S1.** Mass spectrometric data from limited-PK digestion

**Table S2.** Trp fit parameters

**Figure S1.** Characterization of purified TDP-43<sub>CTD</sub> proteins

**Figure S2.** Comparison of PK digestion of mutants to WT

**Figure S3.** Quiescent vs. shaking conditions for aggregation

**Figure S4.** Full Raman spectra of WT and mutants

**Figure S5.** Characterization of amounts of fibril formed by WT and mutant TDP-43<sub>CTD</sub>

**Figure S6.** Effect of guanidine on W334 aggregation kinetics

**Figure S7.** Effect of protein concentration on WT TDP-43<sub>CTD</sub> aggregation kinetics

**Figure S8.** Kinetics and TEM of seeded reactions of WT TDP-43<sub>CTD</sub>

**Figure S9.** WT TDP-43<sub>CTD</sub> forms fibrils at intermediate time-point

**Figure S10.** TEM characterization of intermediate time-point

## Extended Materials and Methods

**Protein Expression.** A single colony was chosen from the transformed plate, and inoculated into 500 mL LB medium with 100 mg/L kanamycin in a 2.8 L baffled shake flask. After overnight growth at 37 °C with a shaking speed of 220 rpm, the culture was used to inoculate 13-L medium in the fermenter. A 20-L BioFlo 4500 fermenter (New Brunswick Scientific, Edison, NJ) with a working volume of 13 L was used for large-scale fermentation. The fermenter was batched with 10 g/L tryptone, 5 g/L YE, 5 g/L NaCl, 3.5 g/L glucose, 1 g/L  $\text{MgSO}_4 \cdot 7\text{H}_2\text{O}$ , 12 g/L  $\text{K}_2\text{HPO}_4$ , with 50 mg/L kanamycin, pH 7. Temperature was controlled at 37 °C, pH was controlled at 7 with 30%  $\text{NH}_4\text{OH}$ , and dissolved oxygen was controlled at 20%. BioCommand Plus software from NBS was used for data collection. When  $\text{OD}_{600\text{nm}}$  reached above 3.0, cells were induced with 0.8 mM IPTG. Addition of 3.0 g/L of glucose was added at the time of induction and 2 h post induction. Four hours after induction, cells were harvested using a CARR Pilot continuous centrifuge at a flow rate of 250 mL/min. Cell pellets were flash frozen with liquid nitrogen and stored at -80 °C until protein purification (NHLBI Protein Expression Facility).

**TEV protease purification.** Cell pellet was resuspended in lysis buffer (1X PBS, 10 % glycerol, 25 mM imidazole, pH 8.0) and were lysed *via* 3 cycles of 30-s sonication on ice with a 3-mm tapered microtip attached to a Branson Sonifier 450 (50% duty cycle, output control = 5). DNA was precipitated by the addition of 0.1 % PEI. Precipitated DNA was removed by centrifugation at 18,000  $\times g$  for 30 min at 4 °C. Protein in supernatant was bound to a preequilibrated HisTrap FF 16/10 column (GE Healthcare), and eluted with a linear gradient of elution buffer (lysis buffer with 500 mM imidazole, pH 8.0). Fractions containing TEV protease was buffer exchanged into 1X PBS with 1 mM DTT and 0.5 mM EDTA, concentrated to 1 mg/mL, snap frozen with liquid nitrogen, and stored at -80 °C until use.

**Limited Proteolysis.** Reactions were prepared in glass vials (VWR International model no. 10803-890). Pre-formed TDP-43<sub>CTD</sub> fibrils (50  $\mu\text{M}$ ) were mixed with either 2, 20, or 200 ng/mL of PK (Invitrogen) in 10 mM NaPi buffer at pH 7.4. Reactions were incubated overnight at 37 °C with shaking (600 rpm). To terminate the digestion, guanidine hydrochloride was added to a final concentration of 4 M. Trifluoroacetic acid was added to the samples to a final amount of 0.5% (w/v) and then subjected to LC-MS analysis using a Agilent 6200 series ESI-TOF LC-MS instrument (NHLBI Biochemistry Core). Deconvolution of the primary eluting species was then performed using MassHunter software (Agilent Technologies) to identify peptide fragments.

**Table S1.** Mass spectrometric analysis of PK digestion.

| WT TDP-43 CTD (50 $\mu$ M) + PK (200 ng/mL) |                       |                      | WT TDP-43 CTD (50 $\mu$ M) + PK (20 ng/mL) |                       |                      | WT TDP-43 CTD (50 $\mu$ M) + PK (2 ng/mL) |                       |                      |
|---------------------------------------------|-----------------------|----------------------|--------------------------------------------|-----------------------|----------------------|-------------------------------------------|-----------------------|----------------------|
| Observed Mass (da)                          | Theoretical Mass (da) | Position in Sequence | Observed Mass (da)                         | Theoretical Mass (da) | Position in Sequence | Observed Mass (da)                        | Theoretical Mass (da) | Position in Sequence |
| 14890.55                                    | 14889.93              | *267-414             | 14890.24                                   | 14889.93              | *267-414             | 14890.23                                  | 14889.93              | *267-414             |
| 10568.67                                    | 10568.51              | *267-368             | 12236.38                                   | 12236.18              | *267-386             | 12236.55                                  | 12236.18              | *267-386             |
| 9844.83                                     | 9844.7                | 270-368              | 10712.76                                   | 10712.64              | *267-371             | 10712.75                                  | 10712.64              | *267-371             |
|                                             |                       |                      | 10568.69                                   | 10568.51              | *267-368             | 10568.67                                  | 10568.51              | *267-368             |

  

| W334 TDP-43 CTD (50 $\mu$ M) + PK (20 ng/mL) |                       |                      | W385 TDP-43 CTD (50 $\mu$ M) + PK (20 ng/mL) |                       |                      | W412 TDP-43 CTD (50 $\mu$ M) + PK (20 ng/mL) |                       |                      |
|----------------------------------------------|-----------------------|----------------------|----------------------------------------------|-----------------------|----------------------|----------------------------------------------|-----------------------|----------------------|
| Observed Mass (da)                           | Theoretical Mass (da) | Position in Sequence | Observed Mass (da)                           | Theoretical Mass (da) | Position in Sequence | Observed Mass (da)                           | Theoretical Mass (da) | Position in Sequence |
| 14813.06                                     | 14811.85              | *267-414             | 14813.14                                     | 14811.85              | *267-414             | 14812.45                                     | 14811.85              | *267-414             |
| 10712.85                                     | 10712.64              | *267-371             | 12198.49                                     | 12197.14              | *267-386             | 12159.54                                     | 12158.1               | *267-386             |
| 10568.97                                     | 10568.51              | *267-368             | 11441.19                                     | 11440.33              | *267-378             | 10674.05                                     | 10673.6               | *267-371             |
|                                              |                       |                      | 10674.22                                     | 10673.6               | *267-371             | 10674.05                                     | 10568.51              | *267-368             |

\* indicates the fragment still contains the three-residue overhang GHM

**Table S2.** Trp Fit Parameters.<sup>1</sup>

| Protein             | $\lambda_{\text{max}}$ (nm) | $\Gamma$ (nm) | $\rho$        |
|---------------------|-----------------------------|---------------|---------------|
| <b>WT</b> soluble   | $347 \pm 0.2$               | $61 \pm 0.3$  | $1.4 \pm 0.0$ |
| fibrillar           | $336 \pm 2.6$               | $63 \pm 2.5$  | $1.4 \pm 0.1$ |
| <b>W334</b> soluble | $347 \pm 0.4$               | $65 \pm 0.9$  | $1.3 \pm 0.0$ |
| intermediate        | $338 \pm 3.2$               | $65 \pm 0.5$  | $1.3 \pm 0.0$ |
| fibrillar           | $331 \pm 2.3$               | $63 \pm 2.4$  | $1.3 \pm 0.1$ |
| <b>W385</b> soluble | $347 \pm 0.3$               | $64 \pm 0.3$  | $1.3 \pm 0.0$ |
| fibrillar           | $323 \pm 3.2$               | $83 \pm 3.9$  | $1.2 \pm 0.1$ |
| <b>W412</b> soluble | $348 \pm 0.2$               | $66 \pm 0.1$  | $1.3 \pm 0.0$ |
| fibrillar           | $334 \pm 2.6$               | $75 \pm 3.0$  | $1.1 \pm 0.1$ |

<sup>1</sup>Data reported are averages and standard deviations from multiple protein preparations and at least 4 independent measurements.

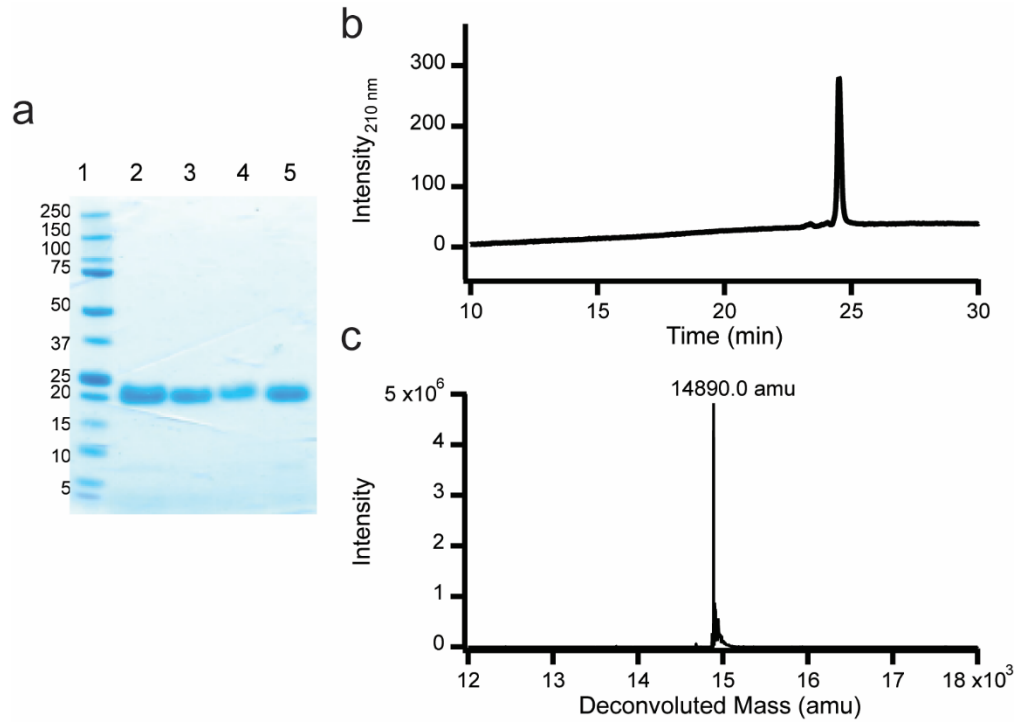

**Figure S1.** Characterization of purified TDP-43<sub>CTD</sub> proteins. (a) SDS-PAGE of purified WT and mutant TDP-43<sub>CTD</sub>. Lanes are as follows, (1) Ladder (2) WT (3) W334 (4) W385 (5) W412. Representative LC trace (b) and MS analysis (c) of purified WT TDP-43<sub>CTD</sub>.

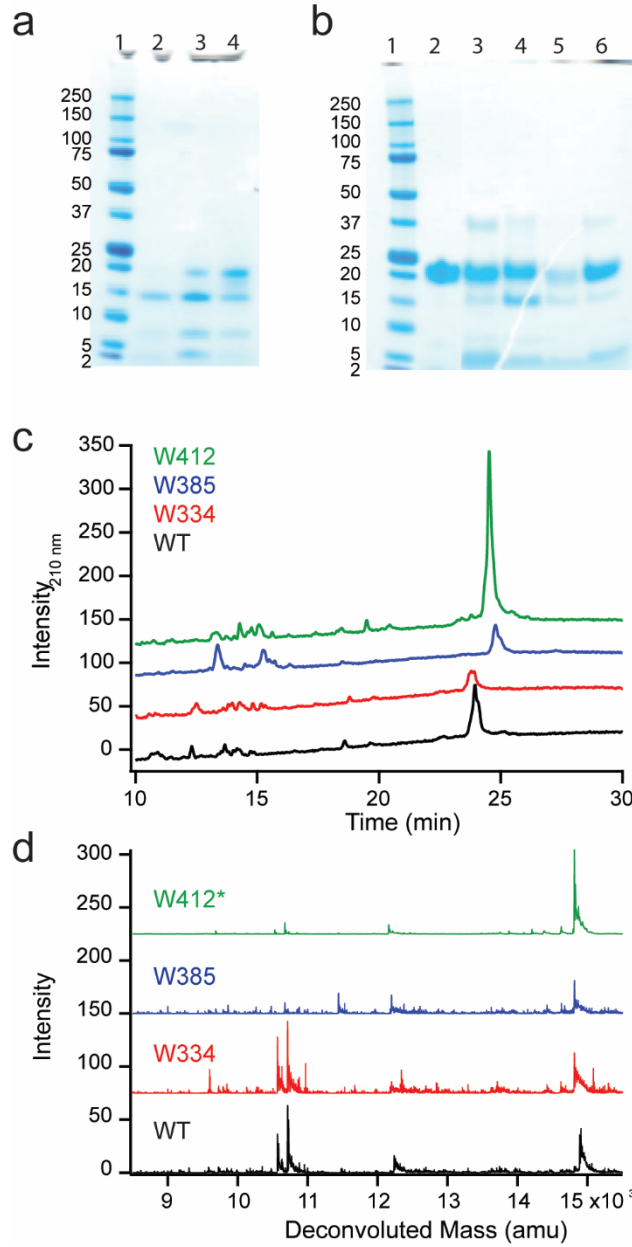

**Figure S2.** Comparison of PK digestion of mutants to WT. (a) SDS-PAGE of limited-PK digestion of WT TDP-43<sub>CTD</sub> (~50 μM) as a function of decreasing PK. Lanes: (1) ladder, (2) 200 ng/mL PK, (3) 20 ng/mL PK, and (4) 2 ng/mL PK. (b) Comparison of SDS-PAGE analysis of PK digestion of fibrils (~50 μM) at 20 ng/mL. Lanes (1) Ladder, (2) Soluble WT Control (-PK), (3) WT + PK, (4) W334 + PK, (5) W385 + PK, and (6) W412 + PK. (c) LC traces monitored at 210 nm and (d) MS analysis for limited-PK digestion of WT (black), W334 (red), W385 (blue), W412 (green) TDP-43<sub>CTD</sub>. W412 has been scaled down by a factor of 10 for ease of comparison. Spectra are off-set. Masses are reported in **Table S1**. Incubated with 20 ng/mL PK for 18 h at 37 °C in pH 7.4 buffer with shaking.

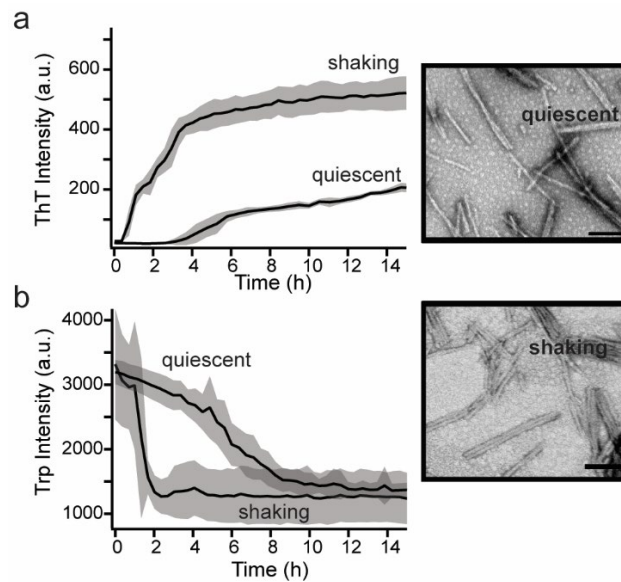

**Fig S3.** Quiescent vs. shaking conditions for aggregation. ThT (a) and Trp (b) aggregation kinetics of WT TDP-43<sub>CTD</sub> in shaking and quiescent conditions ([TDP-43<sub>CTD</sub>] = 10  $\mu$ M, [ThT] = 5  $\mu$ M in 10 mM NaPi, pH 7.4 at 37  $^{\circ}$ C, final [GuHCl] is 135 and 160 mM for shaking and quiescent conditions, respectively). Lines and shading represent the mean and standard deviation, respectively ( $n = 5$ ). (Right) TEM images of shaking and quiescent conditions. Scale bars are 100 nm.

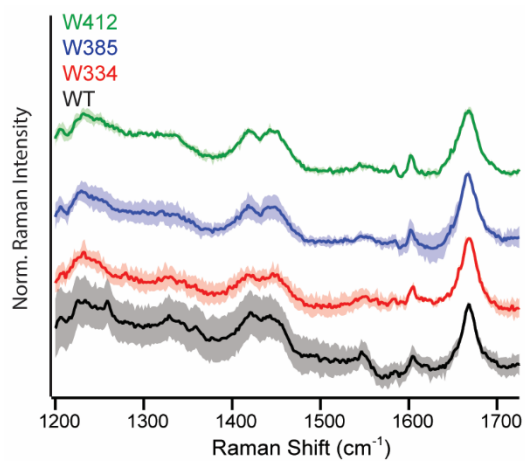

**Figure S4.** Full Raman spectra of WT and mutants. Comparison of WT (black), W334 (red), W385 (blue), and W412 (green) fibrils. Spectra are normalized to the amide-I ( $1668\text{ cm}^{-1}$ ) and offset for clarity. Lines and shading represent the mean and standard deviation, respectively ( $n = 3$ ).



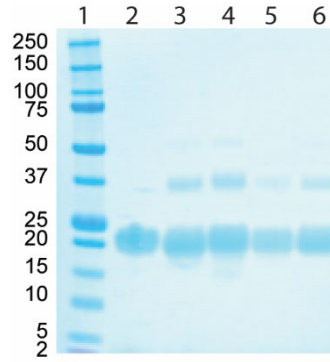

**Figure S5.** Comparison of amounts of fibrils formed by WT and mutant TDP-43<sub>CTD</sub>. SDS-PAGE analysis of the pellet fraction of aggregated material. Lanes: (1) ladder, (2) Soluble WT control, (3) WT, (4) W334, (5) W385, and (6) W412. 10  $\mu$ M proteins were aggregated in 10 mM NaPi, pH 7.4 under shaking conditions at 37 °C. We attribute the band at 37 kDa to an SDS-insoluble dimer formed during aggregation.

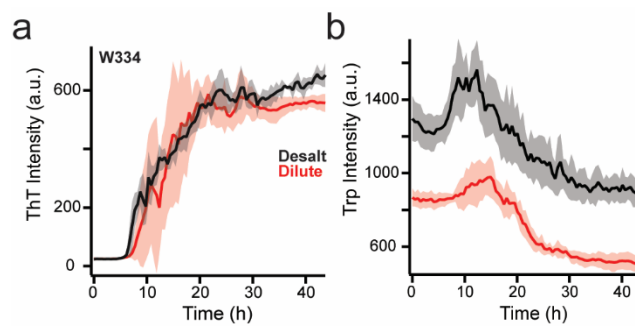

**Figure S6.** Effect of guanidine on W334 aggregation kinetics. Comparison of W334 TDP-43<sub>CTD</sub> (a) Trp and (b) ThT kinetics at 10  $\mu$ M in desalted (black, 0 mM GuHCl) and diluted (red, 170 mM GuHCl) conditions (10 mM NaPi, pH 7.4 at 37  $^{\circ}$ C, under quiescent conditions). Lines and shading represent the mean and standard deviation ( $n \geq 5$ ).

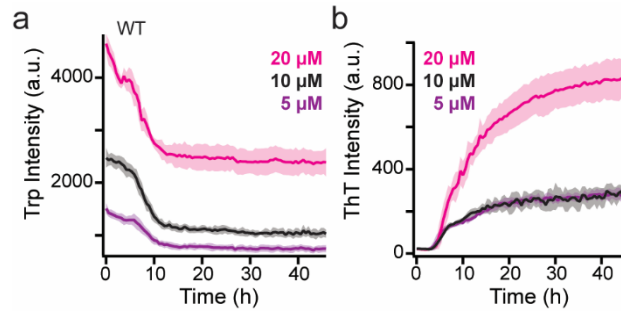

**Figure S7.** Protein concentration dependence of WT TDP-43<sub>CTD</sub> aggregation. Comparison of (a) Trp and (b) ThT kinetics at 5, 10, and 20 μM (10 mM NaPi, 180 mM GuHCl, pH 7.4 at 37 °C, under quiescent conditions). Lines and shading represent the mean and standard deviation ( $n \geq 5$ ). Note that the ThT curves for 5 and 10 μM overlay.

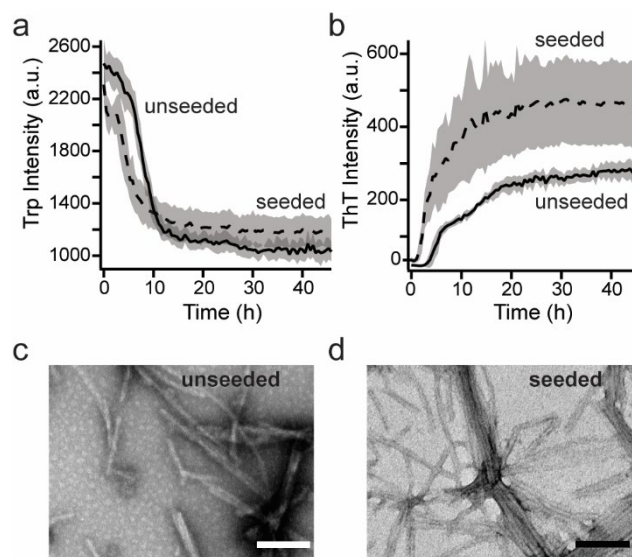

**Figure S8.** Characterization of seeded WT TDP-43<sub>CTD</sub> aggregation. Comparison of (a) Trp and (b) ThT aggregation kinetics in the absence (solid) and presence (dashed) of 10% v/v pre-formed WT seeds ([WT] = 10  $\mu$ M, in 10 mM NaPi, 180 mM GuHCl, pH 7.4 at 37 °C, under quiescent conditions). Lines and shading represent the mean and standard deviation ( $n \geq 5$ ). Resulting TEM from (c) unseeded and (d) seeded reactions. Scale bars are 100 nm.

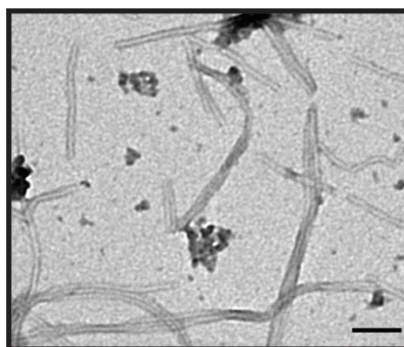

**Figure S9.** WT TDP-43<sub>CTD</sub> forms fibrils at intermediate time-point in seeded reaction. TEM taken at intermediate time point (~4.5 h) from seeding of WT TDP-43<sub>CTD</sub> with 10% v/v preformed WT seeds ([WT] = 10  $\mu$ M, in 10 mM NaPi, pH 7.4 at 37 °C, under quiescent conditions). Scale bar is 100 nm.

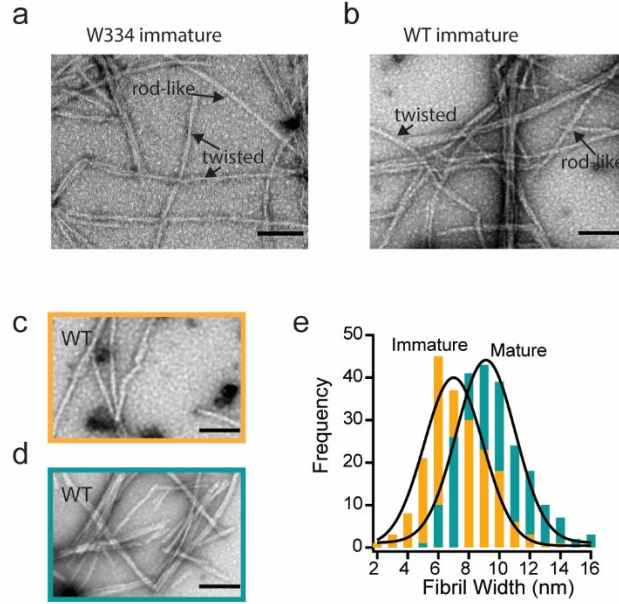

**Figure S10.** TEM characterization of WT at intermediate time-point. Comparison of TEM images of (a) W334 and (b) WT TDP-43<sub>CTD</sub> taken after ~1 h of incubation. Rod-like and twisted fibrils are indicated by arrows. TEM images of WT TDP-43<sub>CTD</sub> at (c) ~1 h of incubation (orange, immature) and after (d) ≥ 24 h of incubation (teal, mature) ([protein] = 10 μM, in 10 mM NaPi, pH 7.4 at 37 °C, under shaking conditions). Scale bars are 100 nm. (e) Histograms of immature (orange) and mature (teal) fibril width.  $n = 185$  measurements for each. Gaussian fits are shown as black lines.
